# Supplementary material
Source: publisher figshare collection journal article supplement (https://acs.figshare.com/ndownloader/files/5094238)
Supplement: Supplementary file 1 [file 5094238]

 
data_03MMD288 
 
_audit_creation_method            SHELXL-97 
_chemical_name_systematic 
; 
Aqua-(1,4-bis-(4-tert-butyl-1-methyl-1H-imidazol-2-yl)-1,4-dithia
butane-S,S')-(\h^5^pentamethylcyclopentadienyl)-iridium bis(trifluoro
methanesulfonate), diacetone solvate
; 
_chemical_name_common             ? 
_chemical_melting_point           ? 
_chemical_formula_moiety          ? 
_chemical_formula_sum 
 'C36 H59 F6 Ir N4 O9 S4' 
_chemical_formula_weight          1126.31 
 
loop_ 
 _atom_type_symbol 
 _atom_type_description 
 _atom_type_scat_dispersion_real 
 _atom_type_scat_dispersion_imag 
 _atom_type_scat_source 
 'C'  'C'   0.0033   0.0016 
 'International Tables Vol C Tables 4.2.6.8 and 6.1.1.4' 
 'H'  'H'   0.0000   0.0000 
 'International Tables Vol C Tables 4.2.6.8 and 6.1.1.4' 
 'N'  'N'   0.0061   0.0033 
 'International Tables Vol C Tables 4.2.6.8 and 6.1.1.4' 
 'O'  'O'   0.0106   0.0060 
 'International Tables Vol C Tables 4.2.6.8 and 6.1.1.4' 
 'F'  'F'   0.0171   0.0103 
 'International Tables Vol C Tables 4.2.6.8 and 6.1.1.4' 
 'S'  'S'   0.1246   0.1234 
 'International Tables Vol C Tables 4.2.6.8 and 6.1.1.4' 
 'Ir'  'Ir'  -1.4442   7.9887 
 'International Tables Vol C Tables 4.2.6.8 and 6.1.1.4' 
 
_symmetry_cell_setting           'Triclinic'
_symmetry_space_group_name_H-M   'P -1' 
 
loop_ 
 _symmetry_equiv_pos_as_xyz 
 'x, y, z' 
 '-x, -y, -z' 
 
_cell_length_a                    11.892(1) 
_cell_length_b                    14.532(1) 
_cell_length_c                    15.385(1) 
_cell_angle_alpha                 101.934(1) 
_cell_angle_beta                  95.489(1) 
_cell_angle_gamma                 103.635(1) 
_cell_volume                      2498.6(3) 
_cell_formula_units_Z             2 
_cell_measurement_temperature     293(2)
_cell_measurement_reflns_used     6514
_cell_measurement_theta_min        2.38
_cell_measurement_theta_max       25.59 
 
_exptl_crystal_description        'prism'
_exptl_crystal_colour             'yellow'
_exptl_crystal_size_min           0.156
_exptl_crystal_size_mid           0.188
_exptl_crystal_size_max           0.292
_exptl_crystal_density_meas       ? 
_exptl_crystal_density_diffrn     1.497 
_exptl_crystal_density_method     'not measured' 
_exptl_crystal_F_000              1140 
_exptl_absorpt_coefficient_mu     2.910 
_exptl_absorpt_correction_type    'analytical: face-indexed'
_exptl_absorpt_correction_T_min   0.5318
_exptl_absorpt_correction_T_max   0.7127
_exptl_absorpt_process_details    ? 
 
_exptl_special_details 
; 
 ? 
; 
 
_diffrn_ambient_temperature       293(2) 
_diffrn_radiation_wavelength      0.71073 
_diffrn_radiation_type            MoK\a 
_diffrn_radiation_source          'fine-focus sealed tube' 
_diffrn_radiation_monochromator   graphite 
_diffrn_measurement_device_type   'Bruker Smart Apex CCD diffractometer' 
_diffrn_measurement_method        \p and \w-scans 
_diffrn_detector_area_resol_mean  0.661 
_diffrn_standards_number          ? 
_diffrn_standards_interval_count  ? 
_diffrn_standards_interval_time   ? 
_diffrn_standards_decay_%         0 
_diffrn_reflns_number             44138 
_diffrn_reflns_av_R_equivalents   0.1239 
_diffrn_reflns_av_sigmaI/netI     0.1289 
_diffrn_reflns_limit_h_min        -17 
_diffrn_reflns_limit_h_max        15 
_diffrn_reflns_limit_k_min        -20 
_diffrn_reflns_limit_k_max        20 
_diffrn_reflns_limit_l_min        -21 
_diffrn_reflns_limit_l_max        22 
_diffrn_reflns_theta_min          1.48 
_diffrn_reflns_theta_max          30.55 
_reflns_number_total              15164 
_reflns_number_gt                 9302 
_reflns_threshold_expression      >2sigma(I) 
 
_computing_data_collection        'SMART V 5.625'
_computing_cell_refinement        'SMART V 5.625'
_computing_data_reduction         'SAINT V 6.23C'
_computing_structure_solution     'SHELXS-97 (Sheldrick, 1997)' 
_computing_structure_refinement   'SHELXL-97 (Sheldrick, 1997)' 
_computing_molecular_graphics     'SHELXTL V 6.10'
_computing_publication_material   'SHELXTL V 6.10' 
 
_refine_special_details 
; 
 Refinement of F^2^ against ALL reflections.  The weighted R-factor wR and 
 goodness of fit S are based on F^2^, conventional R-factors R are based 
 on F, with F set to zero for negative F^2^. The threshold expression of 
 F^2^ > 2sigma(F^2^) is used only for calculating R-factors(gt) etc. and is 
 not relevant to the choice of reflections for refinement.  R-factors based 
 on F^2^ are statistically about twice as large as those based on F, and R- 
 factors based on ALL data will be even larger. 
; 
 
_refine_ls_structure_factor_coef  Fsqd  
_refine_ls_matrix_type            full 
_refine_ls_weighting_scheme       calc  
_refine_ls_weighting_details 
 'calc w=1/[\s^2^(Fo^2^)+(0.0001P)^2^] where P=(Fo^2^+2Fc^2^)/3' 
_atom_sites_solution_primary      direct 
_atom_sites_solution_secondary    difmap 
_atom_sites_solution_hydrogens    geom 
_refine_ls_hydrogen_treatment     noref 
_refine_ls_extinction_method      none 
_refine_ls_extinction_coef        ? 
_refine_ls_number_reflns          15164 
_refine_ls_number_parameters      558 
_refine_ls_number_restraints      0 
_refine_ls_R_factor_all           0.0945 
_refine_ls_R_factor_gt            0.0553 
_refine_ls_wR_factor_ref          0.1150 
_refine_ls_wR_factor_gt           0.1043 
_refine_ls_goodness_of_fit_ref    0.977 
_refine_ls_restrained_S_all       0.977 
_refine_ls_shift/su_max           0.342 
_refine_ls_shift/su_mean          0.008 
 
loop_ 
 _atom_site_label 
 _atom_site_type_symbol 
 _atom_site_fract_x 
 _atom_site_fract_y 
 _atom_site_fract_z 
 _atom_site_U_iso_or_equiv 
 _atom_site_adp_type 
 _atom_site_occupancy 
 _atom_site_symmetry_multiplicity 
 _atom_site_calc_flag 
 _atom_site_refinement_flags 
 _atom_site_disorder_assembly 
 _atom_site_disorder_group 
Ir1 Ir 0.640718(17) 0.228085(14) 0.316224(14) 0.04343(8) Uani 1 1 d . . . 
S1 S 0.46523(11) 0.22864(9) 0.37563(9) 0.0475(3) Uani 1 1 d . . . 
S2 S 0.69066(12) 0.39814(9) 0.37420(8) 0.0467(3) Uani 1 1 d . . . 
N1 N 0.2359(4) 0.1675(3) 0.2990(3) 0.0552(11) Uani 1 1 d . . . 
C2 C 0.3464(4) 0.2010(4) 0.2882(3) 0.0457(12) Uani 1 1 d . . . 
N3 N 0.3553(4) 0.2076(3) 0.2047(3) 0.0489(10) Uani 1 1 d . . . 
C4 C 0.2426(5) 0.1770(4) 0.1599(4) 0.0561(14) Uani 1 1 d . . . 
C5 C 0.1702(5) 0.1516(4) 0.2187(4) 0.0635(16) Uani 1 1 d . . . 
H5 H 0.0892 0.1275 0.2058 0.080 Uiso 1 1 calc R . . 
C6 C 0.1937(5) 0.1499(5) 0.3818(4) 0.082(2) Uani 1 1 d . . . 
H6A H 0.2360 0.1101 0.4064 0.080 Uiso 1 1 calc R . . 
H6B H 0.1118 0.1171 0.3689 0.080 Uiso 1 1 calc R . . 
H6C H 0.2057 0.2110 0.4245 0.080 Uiso 1 1 calc R . . 
C7 C 0.2160(6) 0.1676(5) 0.0604(4) 0.0687(17) Uani 1 1 d . . . 
C8 C 0.2950(9) 0.2468(7) 0.0343(5) 0.142(4) Uani 1 1 d . . . 
H8A H 0.2941 0.3079 0.0722 0.080 Uiso 1 1 calc R . . 
H8B H 0.2701 0.2459 -0.0271 0.080 Uiso 1 1 calc R . . 
H8C H 0.3730 0.2387 0.0406 0.080 Uiso 1 1 calc R . . 
C9 C 0.0913(8) 0.1643(8) 0.0335(6) 0.157(4) Uani 1 1 d . . . 
H9A H 0.0417 0.1061 0.0435 0.080 Uiso 1 1 calc R . . 
H9B H 0.0781 0.1643 -0.0290 0.080 Uiso 1 1 calc R . . 
H9C H 0.0735 0.2203 0.0687 0.080 Uiso 1 1 calc R . . 
C10 C 0.2401(11) 0.0789(6) 0.0098(5) 0.157(5) Uani 1 1 d . . . 
H10A H 0.3208 0.0808 0.0259 0.080 Uiso 1 1 calc R . . 
H10B H 0.2244 0.0749 -0.0535 0.080 Uiso 1 1 calc R . . 
H10C H 0.1910 0.0228 0.0237 0.080 Uiso 1 1 calc R . . 
N1' N 0.8279(4) 0.5398(3) 0.3102(3) 0.0560(11) Uani 1 1 d . . . 
C2' C 0.7447(5) 0.4545(4) 0.2904(4) 0.0497(13) Uani 1 1 d . . . 
N3' N 0.7136(4) 0.4187(3) 0.2033(3) 0.0540(11) Uani 1 1 d . . . 
C4' C 0.7805(5) 0.4860(5) 0.1653(4) 0.0625(16) Uani 1 1 d . . . 
C5' C 0.8498(5) 0.5599(4) 0.2311(4) 0.0662(16) Uani 1 1 d . . . 
H5' H 0.9027 0.6147 0.2230 0.080 Uiso 1 1 calc R . . 
C6' C 0.8836(6) 0.6003(4) 0.4000(4) 0.0753(18) Uani 1 1 d . . . 
H6'1 H 0.8348 0.6407 0.4230 0.080 Uiso 1 1 calc R . . 
H6'2 H 0.9585 0.6406 0.3958 0.080 Uiso 1 1 calc R . . 
H6'3 H 0.8939 0.5589 0.4397 0.080 Uiso 1 1 calc R . . 
C7' C 0.7707(8) 0.4707(6) 0.0644(5) 0.092(2) Uani 1 1 d . . . 
C8' C 0.7943(12) 0.3735(7) 0.0241(6) 0.181(6) Uani 1 1 d . . . 
H8'1 H 0.8632 0.3674 0.0579 0.080 Uiso 1 1 calc R . . 
H8'2 H 0.8059 0.3705 -0.0372 0.080 Uiso 1 1 calc R . . 
H8'3 H 0.7286 0.3213 0.0262 0.080 Uiso 1 1 calc R . . 
C9' C 0.6510(9) 0.4715(8) 0.0249(5) 0.148(4) Uani 1 1 d . . . 
H9'1 H 0.5934 0.4218 0.0407 0.080 Uiso 1 1 calc R . . 
H9'2 H 0.6452 0.4593 -0.0394 0.080 Uiso 1 1 calc R . . 
H9'3 H 0.6376 0.5340 0.0480 0.080 Uiso 1 1 calc R . . 
C10' C 0.8641(8) 0.5529(7) 0.0421(6) 0.137(4) Uani 1 1 d . . . 
H10D H 0.8558 0.6150 0.0726 0.080 Uiso 1 1 calc R . . 
H10E H 0.8536 0.5474 -0.0215 0.080 Uiso 1 1 calc R . . 
H10F H 0.9408 0.5471 0.0615 0.080 Uiso 1 1 calc R . . 
C11 C 0.4791(5) 0.3557(4) 0.4266(4) 0.0564(14) Uani 1 1 d . . . 
H11A H 0.4018 0.3663 0.4283 0.080 Uiso 1 1 calc R . . 
H11B H 0.5187 0.3715 0.4880 0.080 Uiso 1 1 calc R . . 
C12 C 0.5465(5) 0.4218(4) 0.3756(4) 0.0538(14) Uani 1 1 d . . . 
H12A H 0.5544 0.4894 0.4048 0.080 Uiso 1 1 calc R . . 
H12B H 0.5062 0.4088 0.3148 0.080 Uiso 1 1 calc R . . 
C13 C 0.7638(6) 0.1546(5) 0.2562(5) 0.076(2) Uani 1 1 d . . . 
C14 C 0.8150(5) 0.2105(4) 0.3408(5) 0.0694(18) Uani 1 1 d . . . 
C15 C 0.7495(6) 0.1805(4) 0.4069(4) 0.0669(16) Uani 1 1 d . . . 
C16 C 0.6582(5) 0.0984(4) 0.3597(5) 0.0606(15) Uani 1 1 d . . . 
C17 C 0.6597(6) 0.0816(4) 0.2679(5) 0.0704(18) Uani 1 1 d . . . 
C18 C 0.8029(8) 0.1592(6) 0.1697(6) 0.121(3) Uani 1 1 d . . . 
H18A H 0.8636 0.2181 0.1766 0.080 Uiso 1 1 calc R . . 
H18B H 0.7382 0.1585 0.1269 0.080 Uiso 1 1 calc R . . 
H18C H 0.8326 0.1040 0.1486 0.080 Uiso 1 1 calc R . . 
C19 C 0.9248(6) 0.2902(6) 0.3600(7) 0.127(3) Uani 1 1 d . . . 
H19A H 0.9908 0.2636 0.3676 0.080 Uiso 1 1 calc R . . 
H19B H 0.9245 0.3369 0.4141 0.080 Uiso 1 1 calc R . . 
H19C H 0.9302 0.3215 0.3109 0.080 Uiso 1 1 calc R . . 
C20 C 0.7824(7) 0.2143(5) 0.5070(5) 0.101(2) Uani 1 1 d . . . 
H20A H 0.7142 0.1973 0.5350 0.080 Uiso 1 1 calc R . . 
H20B H 0.8141 0.2838 0.5233 0.080 Uiso 1 1 calc R . . 
H20C H 0.8399 0.1836 0.5269 0.080 Uiso 1 1 calc R . . 
C21 C 0.5745(7) 0.0391(5) 0.4084(6) 0.105(3) Uani 1 1 d . . . 
H21A H 0.5006 0.0101 0.3700 0.080 Uiso 1 1 calc R . . 
H21B H 0.5634 0.0808 0.4622 0.080 Uiso 1 1 calc R . . 
H21C H 0.6065 -0.0113 0.4237 0.080 Uiso 1 1 calc R . . 
C22 C 0.5784(7) 0.0063(5) 0.1947(6) 0.112(3) Uani 1 1 d . . . 
H22A H 0.6138 -0.0458 0.1750 0.080 Uiso 1 1 calc R . . 
H22B H 0.5617 0.0344 0.1454 0.080 Uiso 1 1 calc R . . 
H22C H 0.5070 -0.0188 0.2163 0.080 Uiso 1 1 calc R . . 
O7 O 0.5735(3) 0.2445(2) 0.1881(2) 0.0502(8) Uani 1 1 d . . . 
H7A H 0.4964 0.2240 0.1516 0.080 Uiso 1 1 d R . . 
H7B H 0.6314 0.3004 0.1800 0.080 Uiso 1 1 d R . . 
S3 S 0.77913(15) 0.50663(14) 0.62747(11) 0.0740(5) Uani 1 1 d . . . 
O1 O 0.8798(5) 0.4788(4) 0.6028(4) 0.1156(19) Uani 1 1 d . . . 
O2 O 0.6718(5) 0.4353(5) 0.6025(4) 0.143(3) Uani 1 1 d . . . 
O3 O 0.7792(5) 0.6009(5) 0.6130(4) 0.130(2) Uani 1 1 d . . . 
C23 C 0.8027(9) 0.5294(7) 0.7469(6) 0.106(3) Uani 1 1 d . . . 
F1 F 0.7137(6) 0.5616(5) 0.7786(4) 0.175(3) Uani 1 1 d . . . 
F2 F 0.8970(6) 0.5978(5) 0.7838(4) 0.173(3) Uani 1 1 d . . . 
F3 F 0.8045(8) 0.4551(5) 0.7764(4) 0.198(3) Uani 1 1 d . . . 
S4 S 0.8698(2) 0.8978(2) 0.25451(16) 0.1088(7) Uani 1 1 d . . . 
O4 O 0.7479(6) 0.8848(5) 0.2403(5) 0.169(3) Uani 1 1 d . . . 
O5 O 0.9090(8) 0.8140(6) 0.2221(6) 0.205(4) Uani 1 1 d . . . 
O6 O 0.9261(7) 0.9804(6) 0.2347(5) 0.191(4) Uani 1 1 d . . . 
C24 C 0.9028(10) 0.9168(7) 0.3703(7) 0.112(3) Uani 1 1 d . . . 
F4 F 1.0193(6) 0.9304(5) 0.3965(4) 0.170(3) Uani 1 1 d . . . 
F5 F 0.8782(9) 0.9951(7) 0.4110(5) 0.240(5) Uani 1 1 d . . . 
F6 F 0.8601(7) 0.8509(6) 0.4041(5) 0.220(4) Uani 1 1 d . . . 
O8 O 0.3701(6) 0.3368(4) 0.6101(5) 0.121(2) Uani 1 1 d . . . 
C25 C 0.4732(9) 0.2276(6) 0.6397(7) 0.135(4) Uani 1 1 d . . . 
H25A H 0.4122 0.1681 0.6291 0.080 Uiso 1 1 calc R . . 
H25B H 0.5337 0.2279 0.6859 0.080 Uiso 1 1 calc R . . 
H25C H 0.5053 0.2320 0.5854 0.080 Uiso 1 1 calc R . . 
C26 C 0.4252(8) 0.3102(6) 0.6681(7) 0.096(2) Uani 1 1 d . . . 
C27 C 0.4296(9) 0.3541(7) 0.7575(8) 0.142(4) Uani 1 1 d . . . 
H27A H 0.4822 0.4181 0.7716 0.080 Uiso 1 1 calc R . . 
H27B H 0.4567 0.3157 0.7946 0.080 Uiso 1 1 calc R . . 
H27C H 0.3528 0.3589 0.7685 0.080 Uiso 1 1 calc R . . 
O9 O 0.3013(9) 0.9235(9) 0.3072(8) 0.235(6) Uani 1 1 d . . . 
C28 C 0.1839(11) 0.7844(9) 0.2424(8) 0.196(7) Uani 1 1 d . . . 
H28A H 0.2336 0.7423 0.2260 0.080 Uiso 1 1 calc R . . 
H28B H 0.1120 0.7621 0.2010 0.080 Uiso 1 1 calc R . . 
H28C H 0.1673 0.7834 0.3021 0.080 Uiso 1 1 calc R . . 
C29 C 0.2379(11) 0.8754(8) 0.2397(15) 0.166(7) Uani 1 1 d . . . 
C30 C 0.2230(14) 0.9098(10) 0.1657(11) 0.246(10) Uani 1 1 d . . . 
H30A H 0.2953 0.9223 0.1418 0.080 Uiso 1 1 calc R . . 
H30B H 0.1994 0.9691 0.1811 0.080 Uiso 1 1 calc R . . 
H30C H 0.1637 0.8624 0.1214 0.080 Uiso 1 1 calc R . . 
 
loop_ 
 _atom_site_aniso_label 
 _atom_site_aniso_U_11 
 _atom_site_aniso_U_22 
 _atom_site_aniso_U_33 
 _atom_site_aniso_U_23 
 _atom_site_aniso_U_13 
 _atom_site_aniso_U_12 
Ir1 0.03821(12) 0.04129(12) 0.04910(12) 0.00695(8) 0.00621(8) 0.01063(8) 
S1 0.0430(8) 0.0524(8) 0.0475(7) 0.0139(6) 0.0089(6) 0.0111(6) 
S2 0.0482(8) 0.0459(7) 0.0432(7) 0.0073(6) 0.0086(6) 0.0086(6) 
N1 0.043(3) 0.060(3) 0.059(3) 0.015(2) 0.012(2) 0.005(2) 
C2 0.040(3) 0.050(3) 0.046(3) 0.007(2) 0.006(2) 0.013(2) 
N3 0.043(3) 0.049(3) 0.050(3) 0.009(2) 0.004(2) 0.006(2) 
C4 0.050(3) 0.054(3) 0.057(3) 0.005(3) -0.001(3) 0.009(3) 
C5 0.039(3) 0.067(4) 0.070(4) 0.001(3) 0.002(3) 0.002(3) 
C6 0.050(4) 0.121(6) 0.070(4) 0.027(4) 0.019(3) 0.004(4) 
C7 0.058(4) 0.084(5) 0.055(4) 0.008(3) -0.001(3) 0.012(3) 
C8 0.182(11) 0.164(9) 0.058(5) 0.014(6) -0.031(6) 0.036(8) 
C9 0.111(8) 0.275(14) 0.081(6) 0.029(7) -0.007(6) 0.065(9) 
C10 0.301(15) 0.118(7) 0.064(5) 0.002(5) 0.005(7) 0.105(9) 
N1' 0.047(3) 0.048(3) 0.068(3) 0.012(2) 0.010(2) 0.004(2) 
C2' 0.044(3) 0.052(3) 0.056(3) 0.017(3) 0.011(3) 0.012(3) 
N3' 0.056(3) 0.060(3) 0.045(3) 0.013(2) 0.012(2) 0.010(2) 
C4' 0.062(4) 0.078(4) 0.060(4) 0.028(3) 0.024(3) 0.026(3) 
C5' 0.060(4) 0.063(4) 0.075(4) 0.026(3) 0.017(3) 0.003(3) 
C6' 0.069(4) 0.054(4) 0.083(5) 0.003(3) -0.005(4) -0.005(3) 
C7' 0.109(7) 0.110(6) 0.061(4) 0.035(4) 0.025(4) 0.020(5) 
C8' 0.342(18) 0.150(9) 0.071(6) 0.030(6) 0.092(9) 0.076(10) 
C9' 0.127(9) 0.238(12) 0.068(5) 0.042(7) 0.009(6) 0.024(8) 
C10' 0.141(9) 0.181(9) 0.100(7) 0.080(7) 0.046(6) 0.013(7) 
C11 0.053(3) 0.061(3) 0.048(3) -0.004(3) 0.012(3) 0.011(3) 
C12 0.053(3) 0.047(3) 0.059(3) 0.000(3) 0.014(3) 0.019(3) 
C13 0.068(5) 0.099(5) 0.089(5) 0.037(4) 0.043(4) 0.048(4) 
C14 0.038(3) 0.054(4) 0.116(6) 0.016(4) 0.007(4) 0.018(3) 
C15 0.075(5) 0.055(4) 0.074(4) 0.020(3) -0.002(4) 0.026(3) 
C16 0.058(4) 0.041(3) 0.090(5) 0.021(3) 0.007(3) 0.025(3) 
C17 0.073(5) 0.051(4) 0.083(5) -0.004(3) 0.008(4) 0.028(3) 
C18 0.122(7) 0.152(8) 0.136(8) 0.056(6) 0.077(6) 0.086(6) 
C19 0.050(5) 0.110(7) 0.221(11) 0.057(7) -0.003(6) 0.016(5) 
C20 0.112(6) 0.095(5) 0.096(6) 0.019(4) -0.022(5) 0.047(5) 
C21 0.102(6) 0.066(5) 0.172(8) 0.063(5) 0.051(6) 0.026(4) 
C22 0.108(7) 0.062(4) 0.137(7) -0.026(5) -0.011(6) 0.023(4) 
O7 0.048(2) 0.054(2) 0.0394(18) 0.0031(16) 0.0063(16) 0.0039(17) 
S3 0.0583(11) 0.0937(13) 0.0633(10) 0.0114(9) 0.0004(8) 0.0168(9) 
O1 0.084(4) 0.130(4) 0.125(5) -0.009(4) 0.021(3) 0.046(3) 
O2 0.080(4) 0.201(6) 0.086(4) -0.010(4) -0.005(3) -0.039(4) 
O3 0.125(5) 0.156(5) 0.157(6) 0.095(5) 0.040(4) 0.075(4) 
C23 0.113(8) 0.108(7) 0.081(6) 0.002(5) 0.017(6) 0.017(6) 
F1 0.184(6) 0.217(7) 0.111(4) 0.000(4) 0.060(4) 0.045(5) 
F2 0.158(6) 0.184(6) 0.101(4) -0.021(4) -0.027(4) -0.035(5) 
F3 0.310(10) 0.159(5) 0.133(5) 0.082(4) -0.010(5) 0.052(6) 
S4 0.0948(18) 0.133(2) 0.0969(16) 0.0393(15) 0.0048(13) 0.0191(15) 
O4 0.081(5) 0.201(7) 0.206(8) 0.052(6) -0.036(5) 0.019(5) 
O5 0.220(9) 0.196(8) 0.185(8) -0.050(6) 0.014(7) 0.115(7) 
O6 0.188(8) 0.191(7) 0.166(7) 0.113(6) -0.003(6) -0.052(6) 
C24 0.119(8) 0.099(7) 0.115(7) 0.044(6) 0.014(7) 0.010(6) 
F4 0.139(5) 0.188(6) 0.160(5) 0.045(4) -0.056(4) 0.024(5) 
F5 0.349(12) 0.254(8) 0.133(6) -0.034(6) 0.004(6) 0.197(9) 
F6 0.252(9) 0.224(7) 0.176(6) 0.130(6) 0.021(6) -0.020(6) 
O8 0.115(5) 0.125(5) 0.141(5) 0.067(4) 0.035(4) 0.028(4) 
C25 0.162(9) 0.097(6) 0.190(10) 0.064(7) 0.079(8) 0.070(7) 
C26 0.089(6) 0.103(7) 0.096(6) 0.044(5) 0.019(5) 0.004(5) 
C27 0.138(9) 0.124(8) 0.175(12) 0.040(8) 0.032(8) 0.046(7) 
O9 0.142(8) 0.232(11) 0.249(12) -0.016(9) -0.028(8) -0.023(8) 
C28 0.204(15) 0.30(2) 0.114(9) 0.011(11) 0.014(9) 0.152(15) 
C29 0.088(8) 0.076(7) 0.31(2) 0.026(10) 0.039(11) -0.002(6) 
C30 0.25(2) 0.202(16) 0.36(3) 0.180(18) 0.072(17) 0.086(14) 
 
_geom_special_details 
; 
 All esds (except the esd in the dihedral angle between two l.s. planes) 
 are estimated using the full covariance matrix.  The cell esds are taken 
 into account individually in the estimation of esds in distances, angles 
 and torsion angles; correlations between esds in cell parameters are only 
 used when they are defined by crystal symmetry.  An approximate (isotropic) 
 treatment of cell esds is used for estimating esds involving l.s. planes. 
; 
 
loop_ 
 _geom_bond_atom_site_label_1 
 _geom_bond_atom_site_label_2 
 _geom_bond_distance 
 _geom_bond_site_symmetry_2 
 _geom_bond_publ_flag 
Ir1 O7 2.137(3) . ? 
Ir1 C15 2.139(6) . ? 
Ir1 C14 2.155(6) . ? 
Ir1 C16 2.172(5) . ? 
Ir1 C13 2.173(6) . ? 
Ir1 C17 2.177(5) . ? 
Ir1 S2 2.3560(13) . ? 
Ir1 S1 2.3580(13) . ? 
S1 C2 1.765(5) . ? 
S1 C11 1.812(5) . ? 
S2 C2' 1.758(5) . ? 
S2 C12 1.828(5) . ? 
N1 C2 1.329(6) . ? 
N1 C5 1.343(7) . ? 
N1 C6 1.461(7) . ? 
C2 N3 1.320(6) . ? 
N3 C4 1.373(6) . ? 
C4 C5 1.354(8) . ? 
C4 C7 1.504(8) . ? 
C7 C8 1.457(10) . ? 
C7 C10 1.468(9) . ? 
C7 C9 1.488(10) . ? 
C11 C12 1.500(7) . ? 
C13 C14 1.379(9) . ? 
C13 C18 1.461(9) . ? 
C13 C17 1.480(9) . ? 
N1' C5' 1.345(7) . ? 
N1' C2' 1.348(6) . ? 
N1' C6' 1.472(7) . ? 
C2' N3' 1.316(6) . ? 
N3' C4' 1.374(7) . ? 
C4' C5' 1.353(8) . ? 
C4' C7' 1.511(9) . ? 
C7' C9' 1.497(11) . ? 
C7' C8' 1.521(10) . ? 
C7' C10' 1.547(10) . ? 
C14 C15 1.417(9) . ? 
C14 C19 1.485(9) . ? 
C15 C16 1.418(8) . ? 
C15 C20 1.499(9) . ? 
C16 C17 1.385(9) . ? 
C16 C21 1.517(9) . ? 
C17 C22 1.477(9) . ? 
S3 O2 1.403(5) . ? 
S3 O1 1.412(5) . ? 
S3 O3 1.433(5) . ? 
S3 C23 1.781(9) . ? 
C23 F3 1.258(10) . ? 
C23 F2 1.299(9) . ? 
C23 F1 1.348(10) . ? 
S4 O6 1.340(6) . ? 
S4 O4 1.406(6) . ? 
S4 O5 1.418(7) . ? 
S4 C24 1.736(10) . ? 
C24 F6 1.214(9) . ? 
C24 F5 1.292(10) . ? 
C24 F4 1.361(11) . ? 
O8 C26 1.236(9) . ? 
C25 C26 1.453(11) . ? 
C26 C27 1.382(11) . ? 
O9 C29 1.198(18) . ? 
C28 C29 1.339(14) . ? 
C29 C30 1.35(2) . ? 
 
loop_ 
 _geom_angle_atom_site_label_1 
 _geom_angle_atom_site_label_2 
 _geom_angle_atom_site_label_3 

 _geom_angle 
 _geom_angle_site_symmetry_1 
 _geom_angle_site_symmetry_3 
 _geom_angle_publ_flag 
O7 Ir1 C15 155.4(2) . . ? 
O7 Ir1 C14 120.4(2) . . ? 
C15 Ir1 C14 38.5(2) . . ? 
O7 Ir1 C16 130.4(2) . . ? 
C15 Ir1 C16 38.4(2) . . ? 
C14 Ir1 C16 62.8(2) . . ? 
O7 Ir1 C13 90.9(2) . . ? 
C15 Ir1 C13 64.5(3) . . ? 
C14 Ir1 C13 37.2(2) . . ? 
C16 Ir1 C13 63.4(2) . . ? 
O7 Ir1 C17 95.9(2) . . ? 
C15 Ir1 C17 64.8(2) . . ? 
C14 Ir1 C17 64.1(2) . . ? 
C16 Ir1 C17 37.1(2) . . ? 
C13 Ir1 C17 39.8(2) . . ? 
O7 Ir1 S2 90.78(9) . . ? 
C15 Ir1 S2 102.93(17) . . ? 
C14 Ir1 S2 96.56(16) . . ? 
C16 Ir1 S2 138.68(18) . . ? 
C13 Ir1 S2 121.8(2) . . ? 
C17 Ir1 S2 160.27(18) . . ? 
O7 Ir1 S1 94.29(10) . . ? 
C15 Ir1 S1 107.05(19) . . ? 
C14 Ir1 S1 145.1(2) . . ? 
C16 Ir1 S1 93.30(16) . . ? 
C13 Ir1 S1 152.5(2) . . ? 
C17 Ir1 S1 112.69(19) . . ? 
S2 Ir1 S1 85.17(4) . . ? 
C2 S1 C11 102.6(3) . . ? 
C2 S1 Ir1 110.45(17) . . ? 
C11 S1 Ir1 104.74(18) . . ? 
C2' S2 C12 102.5(2) . . ? 
C2' S2 Ir1 108.17(18) . . ? 
C12 S2 Ir1 101.70(17) . . ? 
C2 N1 C5 106.7(5) . . ? 
C2 N1 C6 126.9(5) . . ? 
C5 N1 C6 126.5(5) . . ? 
N3 C2 N1 111.9(5) . . ? 
N3 C2 S1 125.2(4) . . ? 
N1 C2 S1 122.9(4) . . ? 
C2 N3 C4 105.3(4) . . ? 
C5 C4 N3 108.1(5) . . ? 
C5 C4 C7 129.9(6) . . ? 
N3 C4 C7 121.7(5) . . ? 
N1 C5 C4 107.9(5) . . ? 
C8 C7 C10 104.5(7) . . ? 
C8 C7 C9 111.5(8) . . ? 
C10 C7 C9 108.9(7) . . ? 
C8 C7 C4 110.1(6) . . ? 
C10 C7 C4 110.7(6) . . ? 
C9 C7 C4 111.0(6) . . ? 
C12 C11 S1 111.6(3) . . ? 
C11 C12 S2 107.3(4) . . ? 
C14 C13 C18 129.0(7) . . ? 
C14 C13 C17 106.9(6) . . ? 
C18 C13 C17 124.0(7) . . ? 
C14 C13 Ir1 70.7(3) . . ? 
C18 C13 Ir1 126.3(5) . . ? 
C17 C13 Ir1 70.3(3) . . ? 
C5' N1' C2' 106.2(5) . . ? 
C5' N1' C6' 126.3(5) . . ? 
C2' N1' C6' 127.5(5) . . ? 
N3' C2' N1' 112.4(5) . . ? 
N3' C2' S2 125.4(4) . . ? 
N1' C2' S2 122.2(4) . . ? 
C2' N3' C4' 104.5(5) . . ? 
C5' C4' N3' 109.4(5) . . ? 
C5' C4' C7' 129.8(6) . . ? 
N3' C4' C7' 120.8(6) . . ? 
N1' C5' C4' 107.5(5) . . ? 
C9' C7' C4' 110.5(6) . . ? 
C9' C7' C8' 109.4(8) . . ? 
C4' C7' C8' 109.6(6) . . ? 
C9' C7' C10' 110.0(8) . . ? 
C4' C7' C10' 108.9(7) . . ? 
C8' C7' C10' 108.4(8) . . ? 
C13 C14 C15 110.7(6) . . ? 
C13 C14 C19 124.7(8) . . ? 
C15 C14 C19 124.6(7) . . ? 
C13 C14 Ir1 72.1(4) . . ? 
C15 C14 Ir1 70.1(3) . . ? 
C19 C14 Ir1 125.4(4) . . ? 
C14 C15 C16 105.4(6) . . ? 
C14 C15 C20 127.4(7) . . ? 
C16 C15 C20 126.2(6) . . ? 
C14 C15 Ir1 71.4(3) . . ? 
C16 C15 Ir1 72.1(3) . . ? 
C20 C15 Ir1 130.1(4) . . ? 
C17 C16 C15 111.2(6) . . ? 
C17 C16 C21 127.1(6) . . ? 
C15 C16 C21 121.6(7) . . ? 
C17 C16 Ir1 71.6(3) . . ? 
C15 C16 Ir1 69.5(3) . . ? 
C21 C16 Ir1 126.9(4) . . ? 
C16 C17 C22 128.8(7) . . ? 
C16 C17 C13 105.6(6) . . ? 
C22 C17 C13 125.5(7) . . ? 
C16 C17 Ir1 71.2(3) . . ? 
C22 C17 Ir1 124.3(5) . . ? 
C13 C17 Ir1 70.0(3) . . ? 
O2 S3 O1 117.3(4) . . ? 
O2 S3 O3 116.2(4) . . ? 
O1 S3 O3 111.5(4) . . ? 
O2 S3 C23 103.5(4) . . ? 
O1 S3 C23 103.4(4) . . ? 
O3 S3 C23 102.4(4) . . ? 
F3 C23 F2 108.8(9) . . ? 
F3 C23 F1 106.0(9) . . ? 
F2 C23 F1 105.6(8) . . ? 
F3 C23 S3 114.2(7) . . ? 
F2 C23 S3 113.0(7) . . ? 
F1 C23 S3 108.7(7) . . ? 
O6 S4 O4 111.0(5) . . ? 
O6 S4 O5 116.4(6) . . ? 
O4 S4 O5 115.8(5) . . ? 
O6 S4 C24 105.7(5) . . ? 
O4 S4 C24 103.3(5) . . ? 
O5 S4 C24 102.8(6) . . ? 
F6 C24 F5 108.5(10) . . ? 
F6 C24 F4 101.7(9) . . ? 
F5 C24 F4 105.8(9) . . ? 
F6 C24 S4 117.6(8) . . ? 
F5 C24 S4 110.9(7) . . ? 
F4 C24 S4 111.4(7) . . ? 
O8 C26 C27 118.8(10) . . ? 
O8 C26 C25 118.3(9) . . ? 
C27 C26 C25 122.6(10) . . ? 
O9 C29 C28 115(2) . . ? 
O9 C29 C30 122.6(13) . . ? 
C28 C29 C30 122.1(19) . . ? 
 
loop_ 
 _geom_hbond_atom_site_label_D 
 _geom_hbond_atom_site_label_H 
 _geom_hbond_atom_site_label_A 
 _geom_hbond_distance_DH 
 _geom_hbond_distance_HA 
 _geom_hbond_distance_DA 
 _geom_hbond_angle_DHA 
 _geom_hbond_site_symmetry_A 
O7 H7A N3  0.97 1.92 2.571(5) 121.8 . 
O7 H7B N3'  0.97 1.71 2.633(5) 157.1 . 
 
_diffrn_measured_fraction_theta_max    0.991 
_diffrn_reflns_theta_full              30.55 
_diffrn_measured_fraction_theta_full   0.991 
_refine_diff_density_max    1.616 
_refine_diff_density_min   -0.581 
_refine_diff_density_rms    0.113 

#===END

data_03MMD291 
 
_audit_creation_method            SHELXL-97 
_chemical_name_systematic 
; 
Aqua-(1,4-bis-(4-tert-butyl-1-methyl-1H-imidazol-2-yl)-1,4-dithia
butane-S,S')-(\h^5^pentamethylcyclopentadienyl)-rhodium bis(trifluoro
methanesulfonate), dichloromethane solvate
; 
_chemical_name_common             ? 
_chemical_melting_point           ? 
_chemical_formula_moiety          ? 
_chemical_formula_sum 
 'C31 H49 Cl2 F6 N4 O7 Rh S4' 
_chemical_formula_weight          1005.79 
 
loop_ 
 _atom_type_symbol 
 _atom_type_description 
 _atom_type_scat_dispersion_real 
 _atom_type_scat_dispersion_imag 
 _atom_type_scat_source 
 'C'  'C'   0.0033   0.0016 
 'International Tables Vol C Tables 4.2.6.8 and 6.1.1.4' 
 'H'  'H'   0.0000   0.0000 
 'International Tables Vol C Tables 4.2.6.8 and 6.1.1.4' 
 'N'  'N'   0.0061   0.0033 
 'International Tables Vol C Tables 4.2.6.8 and 6.1.1.4' 
 'O'  'O'   0.0106   0.0060 
 'International Tables Vol C Tables 4.2.6.8 and 6.1.1.4' 
 'F'  'F'   0.0171   0.0103 
 'International Tables Vol C Tables 4.2.6.8 and 6.1.1.4' 
 'S'  'S'   0.1246   0.1234 
 'International Tables Vol C Tables 4.2.6.8 and 6.1.1.4' 
 'Cl'  'Cl'   0.1484   0.1585 
 'International Tables Vol C Tables 4.2.6.8 and 6.1.1.4' 
 'Rh'  'Rh'  -1.1178   0.9187 
 'International Tables Vol C Tables 4.2.6.8 and 6.1.1.4' 
 
_symmetry_cell_setting           'Triclinic'
_symmetry_space_group_name_H-M   'P -1'
 
loop_ 
 _symmetry_equiv_pos_as_xyz 
 'x, y, z' 
 '-x, -y, -z' 
 
_cell_length_a                    12.578(1) 
_cell_length_b                    13.659(1) 
_cell_length_c                    13.886(1) 
_cell_angle_alpha                 68.913(1) 
_cell_angle_beta                  80.391(1) 
_cell_angle_gamma                 84.195(1) 
_cell_volume                      2192.5(3) 
_cell_formula_units_Z             2 
_cell_measurement_temperature     293(2)
_cell_measurement_reflns_used     6540
_cell_measurement_theta_min        2.24
_cell_measurement_theta_max       30.52 
 
_exptl_crystal_description        'prism'
_exptl_crystal_colour             'orange'
_exptl_crystal_size_min           0.114
_exptl_crystal_size_mid           0.196
_exptl_crystal_size_max           0.462 
_exptl_crystal_density_meas       ? 
_exptl_crystal_density_diffrn     1.524 
_exptl_crystal_density_method     'not measured' 
_exptl_crystal_F_000              1032 
_exptl_absorpt_coefficient_mu     0.773 
_exptl_absorpt_correction_type    'analytical: face-indexed'
_exptl_absorpt_correction_T_min   0.7968
_exptl_absorpt_correction_T_max   0.9345 
_exptl_absorpt_process_details    ? 
 
_exptl_special_details 
; 
 ? 
; 
 
_diffrn_ambient_temperature       293(2) 
_diffrn_radiation_wavelength      0.71073 
_diffrn_radiation_type            MoK\a 
_diffrn_radiation_source          'fine-focus sealed tube' 
_diffrn_radiation_monochromator   graphite 
_diffrn_measurement_device_type   'Bruker Smart Apex CCD diffractometer' 
_diffrn_measurement_method        \p and \w-scans 
_diffrn_detector_area_resol_mean  0.661 
_diffrn_standards_number          ? 
_diffrn_standards_interval_count  ? 
_diffrn_standards_interval_time   ? 
_diffrn_standards_decay_%         0 
_diffrn_reflns_number             38696 
_diffrn_reflns_av_R_equivalents   0.0569 
_diffrn_reflns_av_sigmaI/netI     0.0786 
_diffrn_reflns_limit_h_min        -17 
_diffrn_reflns_limit_h_max        17 
_diffrn_reflns_limit_k_min        -19 
_diffrn_reflns_limit_k_max        18 
_diffrn_reflns_limit_l_min        -19 
_diffrn_reflns_limit_l_max        19 
_diffrn_reflns_theta_min          1.59 
_diffrn_reflns_theta_max          30.57 
_reflns_number_total              13331 
_reflns_number_gt                 9042 
_reflns_threshold_expression      >2sigma(I) 
 
_computing_data_collection        'SMART V 5.625'
_computing_cell_refinement        'SMART V 5.625'
_computing_data_reduction         'SAINT V 6.23C'
_computing_structure_solution     'SHELXS-97 (Sheldrick, 1997)' 
_computing_structure_refinement   'SHELXL-97 (Sheldrick, 1997)' 
_computing_molecular_graphics     'SHELXTL V 6.10'
_computing_publication_material   'SHELXTL V 6.10' 
 
_refine_special_details 
; 
 Refinement of F^2^ against ALL reflections.  The weighted R-factor wR and 
 goodness of fit S are based on F^2^, conventional R-factors R are based 
 on F, with F set to zero for negative F^2^. The threshold expression of 
 F^2^ > 2sigma(F^2^) is used only for calculating R-factors(gt) etc. and is 
 not relevant to the choice of reflections for refinement.  R-factors based 
 on F^2^ are statistically about twice as large as those based on F, and R- 
 factors based on ALL data will be even larger. 
; 
 
_refine_ls_structure_factor_coef  Fsqd  
_refine_ls_matrix_type            full 
_refine_ls_weighting_scheme       calc  
_refine_ls_weighting_details 
 'calc w=1/[\s^2^(Fo^2^)+(0.0334P)^2^] where P=(Fo^2^+2Fc^2^)/3' 
_atom_sites_solution_primary      direct 
_atom_sites_solution_secondary    difmap 
_atom_sites_solution_hydrogens    geom 
_refine_ls_hydrogen_treatment     mixed 
_refine_ls_extinction_method      none 
_refine_ls_extinction_coef        ? 
_refine_ls_number_reflns          13331 
_refine_ls_number_parameters      515 
_refine_ls_number_restraints      0 
_refine_ls_R_factor_all           0.0849 
_refine_ls_R_factor_gt            0.0522 
_refine_ls_wR_factor_ref          0.1019 
_refine_ls_wR_factor_gt           0.0930 
_refine_ls_goodness_of_fit_ref    0.980 
_refine_ls_restrained_S_all       0.980 
_refine_ls_shift/su_max           0.004 
_refine_ls_shift/su_mean          0.000 
 
loop_ 
 _atom_site_label 
 _atom_site_type_symbol 
 _atom_site_fract_x 
 _atom_site_fract_y 
 _atom_site_fract_z 
 _atom_site_U_iso_or_equiv 
 _atom_site_adp_type 
 _atom_site_occupancy 
 _atom_site_symmetry_multiplicity 
 _atom_site_calc_flag 
 _atom_site_refinement_flags 
 _atom_site_disorder_assembly 
 _atom_site_disorder_group 
Rh1 Rh 0.322783(16) 0.807761(17) 0.337712(17) 0.03314(7) Uani 1 1 d . . . 
S1 S 0.15007(5) 0.84936(6) 0.42094(5) 0.03977(17) Uani 1 1 d . . . 
S2 S 0.22491(6) 0.81940(6) 0.19708(6) 0.04205(18) Uani 1 1 d . . . 
N1 N 0.07718(18) 0.78920(18) 0.62922(17) 0.0393(6) Uani 1 1 d . . . 
C2 C 0.1347(2) 0.7626(2) 0.5508(2) 0.0392(7) Uani 1 1 d . . . 
N3 N 0.18404(19) 0.66885(19) 0.58447(18) 0.0462(6) Uani 1 1 d . . . 
C4 C 0.1568(2) 0.6335(2) 0.6910(2) 0.0488(8) Uani 1 1 d . . . 
C5 C 0.0914(2) 0.7074(2) 0.7185(2) 0.0475(8) Uani 1 1 d . . . 
H5 H 0.0618 0.7029 0.7858 0.080 Uiso 1 1 calc R . . 
C6 C 0.0086(2) 0.8837(2) 0.6222(2) 0.0514(8) Uani 1 1 d . . . 
H6A H 0.0519 0.9442 0.5928 0.080 Uiso 1 1 calc R . . 
H6B H -0.0261 0.8792 0.6906 0.080 Uiso 1 1 calc R . . 
H6C H -0.0452 0.8897 0.5785 0.080 Uiso 1 1 calc R . . 
C7 C 0.1990(3) 0.5289(3) 0.7580(3) 0.0718(11) Uani 1 1 d . . . 
C8 C 0.3196(4) 0.5251(4) 0.7425(4) 0.130(2) Uani 1 1 d . . . 
H8A H 0.3441 0.5739 0.7685 0.080 Uiso 1 1 calc R . . 
H8B H 0.3461 0.5435 0.6696 0.080 Uiso 1 1 calc R . . 
H8C H 0.3460 0.4554 0.7796 0.080 Uiso 1 1 calc R . . 
C9 C 0.1555(5) 0.5098(4) 0.8697(3) 0.149(3) Uani 1 1 d . . . 
H9A H 0.1807 0.5619 0.8911 0.080 Uiso 1 1 calc R . . 
H9B H 0.1798 0.4412 0.9119 0.080 Uiso 1 1 calc R . . 
H9C H 0.0780 0.5142 0.8779 0.080 Uiso 1 1 calc R . . 
C10 C 0.1655(5) 0.4441(3) 0.7255(4) 0.134(2) Uani 1 1 d . . . 
H10A H 0.1928 0.3771 0.7682 0.080 Uiso 1 1 calc R . . 
H10B H 0.1940 0.4566 0.6538 0.080 Uiso 1 1 calc R . . 
H10C H 0.0881 0.4445 0.7339 0.080 Uiso 1 1 calc R . . 
N1' N 0.18428(19) 0.6754(2) 0.11449(19) 0.0488(6) Uani 1 1 d . . . 
C2' C 0.2082(2) 0.6928(2) 0.1974(2) 0.0413(7) Uani 1 1 d . . . 
N3' N 0.21739(19) 0.60509(19) 0.27640(18) 0.0432(6) Uani 1 1 d . . . 
C4' C 0.2000(2) 0.5261(3) 0.2424(3) 0.0482(8) Uani 1 1 d . . . 
C5' C 0.1789(2) 0.5695(3) 0.1428(2) 0.0528(8) Uani 1 1 d . . . 
H5' H 0.1636 0.5336 0.1015 0.080 Uiso 1 1 calc R . . 
C6' C 0.1717(3) 0.7521(3) 0.0109(2) 0.0698(11) Uani 1 1 d . . . 
H6'1 H 0.1796 0.8216 0.0102 0.080 Uiso 1 1 calc R . . 
H6'2 H 0.1014 0.7477 -0.0052 0.080 Uiso 1 1 calc R . . 
H6'3 H 0.2259 0.7374 -0.0402 0.080 Uiso 1 1 calc R . . 
C7' C 0.2073(3) 0.4131(3) 0.3124(3) 0.0614(9) Uani 1 1 d . . . 
C8' C 0.3186(3) 0.3884(3) 0.3473(3) 0.0889(14) Uani 1 1 d . . . 
H8'1 H 0.3731 0.4052 0.2873 0.080 Uiso 1 1 calc R . . 
H8'2 H 0.3257 0.3150 0.3879 0.080 Uiso 1 1 calc R . . 
H8'3 H 0.3271 0.4292 0.3889 0.080 Uiso 1 1 calc R . . 
C9' C 0.1929(3) 0.3418(3) 0.2534(3) 0.0877(13) Uani 1 1 d . . . 
H9'1 H 0.1238 0.3578 0.2292 0.080 Uiso 1 1 calc R . . 
H9'2 H 0.1967 0.2699 0.2990 0.080 Uiso 1 1 calc R . . 
H9'3 H 0.2489 0.3529 0.1949 0.080 Uiso 1 1 calc R . . 
C10' C 0.1211(4) 0.3941(3) 0.4070(3) 0.0954(14) Uani 1 1 d . . . 
H10D H 0.1297 0.4406 0.4428 0.080 Uiso 1 1 calc R . . 
H10E H 0.1280 0.3227 0.4530 0.080 Uiso 1 1 calc R . . 
H10F H 0.0510 0.4071 0.3849 0.080 Uiso 1 1 calc R . . 
C11 C 0.0589(2) 0.8008(2) 0.3604(2) 0.0479(8) Uani 1 1 d . . . 
H11A H 0.0685 0.7251 0.3795 0.080 Uiso 1 1 calc R . . 
H11B H -0.0156 0.8179 0.3830 0.080 Uiso 1 1 calc R . . 
C12 C 0.0869(2) 0.8538(2) 0.2442(2) 0.0490(8) Uani 1 1 d . . . 
H12A H 0.0786 0.9293 0.2268 0.080 Uiso 1 1 calc R . . 
H12B H 0.0371 0.8334 0.2092 0.080 Uiso 1 1 calc R . . 
C13 C 0.4868(2) 0.7819(2) 0.3733(2) 0.0470(8) Uani 1 1 d . . . 
C14 C 0.4882(2) 0.8269(3) 0.2643(2) 0.0462(7) Uani 1 1 d . . . 
C15 C 0.4338(2) 0.9277(2) 0.2420(2) 0.0414(7) Uani 1 1 d . . . 
C16 C 0.3969(2) 0.9439(2) 0.3371(2) 0.0438(7) Uani 1 1 d . . . 
C17 C 0.4274(2) 0.8517(3) 0.4203(2) 0.0462(7) Uani 1 1 d . . . 
C18 C 0.5371(3) 0.6773(3) 0.4295(3) 0.0745(11) Uani 1 1 d . . . 
H18A H 0.5255 0.6279 0.3979 0.080 Uiso 1 1 calc R . . 
H18B H 0.5048 0.6531 0.5012 0.080 Uiso 1 1 calc R . . 
H18C H 0.6131 0.6835 0.4254 0.080 Uiso 1 1 calc R . . 
C19 C 0.5473(3) 0.7831(3) 0.1857(3) 0.0752(11) Uani 1 1 d . . . 
H19A H 0.6219 0.7998 0.1726 0.080 Uiso 1 1 calc R . . 
H19B H 0.5164 0.8129 0.1221 0.080 Uiso 1 1 calc R . . 
H19C H 0.5419 0.7082 0.2117 0.080 Uiso 1 1 calc R . . 
C20 C 0.4262(3) 1.0056(3) 0.1356(2) 0.0598(9) Uani 1 1 d . . . 
H20A H 0.3675 1.0555 0.1390 0.080 Uiso 1 1 calc R . . 
H20B H 0.4138 0.9699 0.0905 0.080 Uiso 1 1 calc R . . 
H20C H 0.4924 1.0416 0.1087 0.080 Uiso 1 1 calc R . . 
C21 C 0.3420(3) 1.0416(3) 0.3491(3) 0.0618(9) Uani 1 1 d . . . 
H21A H 0.3952 1.0892 0.3449 0.080 Uiso 1 1 calc R . . 
H21B H 0.2972 1.0244 0.4156 0.080 Uiso 1 1 calc R . . 
H21C H 0.2981 1.0741 0.2947 0.080 Uiso 1 1 calc R . . 
C22 C 0.4099(3) 0.8373(3) 0.5334(2) 0.0701(11) Uani 1 1 d . . . 
H22A H 0.4015 0.7643 0.5741 0.080 Uiso 1 1 calc R . . 
H22B H 0.3460 0.8770 0.5486 0.080 Uiso 1 1 calc R . . 
H22C H 0.4710 0.8615 0.5505 0.080 Uiso 1 1 calc R . . 
O7 O 0.30272(16) 0.64378(16) 0.41773(16) 0.0402(5) Uani 1 1 d . . . 
H7A H 0.258(3) 0.636(3) 0.471(3) 0.080 Uiso 1 1 d . . . 
H7B H 0.265(3) 0.616(3) 0.384(3) 0.080 Uiso 1 1 d . . . 
S3 S 0.75070(7) 0.90291(8) 0.37652(7) 0.0578(2) Uani 1 1 d . . . 
F1 F 0.6930(2) 1.0138(2) 0.19541(19) 0.1113(9) Uani 1 1 d . . . 
F2 F 0.7518(2) 1.10349(19) 0.27118(19) 0.1073(9) Uani 1 1 d . . . 
F3 F 0.8604(2) 1.0119(2) 0.20112(18) 0.1097(9) Uani 1 1 d . . . 
O1 O 0.82980(18) 0.9186(2) 0.43097(18) 0.0729(7) Uani 1 1 d . . . 
O2 O 0.7737(3) 0.8152(2) 0.3428(2) 0.1041(10) Uani 1 1 d . . . 
O3 O 0.64270(19) 0.9158(2) 0.4212(2) 0.0886(9) Uani 1 1 d . . . 
C23 C 0.7643(3) 1.0135(3) 0.2548(3) 0.0697(10) Uani 1 1 d . . . 
S4 S 0.15782(7) 0.18817(7) 0.07683(7) 0.0515(2) Uani 1 1 d . . . 
O4 O 0.1649(2) 0.1006(2) 0.17114(17) 0.0754(7) Uani 1 1 d . . . 
O5 O 0.25565(19) 0.2398(2) 0.0304(2) 0.0789(8) Uani 1 1 d . . . 
O6 O 0.06383(19) 0.2556(2) 0.0783(2) 0.0777(8) Uani 1 1 d . . . 
C24 C 0.1381(3) 0.1252(3) -0.0128(3) 0.0620(9) Uani 1 1 d . . . 
F4 F 0.1248(2) 0.1923(2) -0.10453(17) 0.1073(9) Uani 1 1 d . . . 
F5 F 0.0518(2) 0.0695(2) 0.0211(2) 0.1092(9) Uani 1 1 d . . . 
F6 F 0.2204(2) 0.0608(2) -0.0235(2) 0.1078(9) Uani 1 1 d . . . 
C25 C 0.5356(4) 0.6613(4) 0.9521(5) 0.134(2) Uani 1 1 d . . . 
H25A H 0.5768 0.6052 0.9334 0.080 Uiso 1 1 calc R . . 
H25B H 0.5864 0.7045 0.9622 0.080 Uiso 1 1 calc R . . 
Cl1 Cl 0.45222(12) 0.60710(13) 1.06779(14) 0.1360(5) Uani 1 1 d . . . 
Cl2 Cl 0.46737(15) 0.73709(15) 0.85011(16) 0.1722(7) Uani 1 1 d . . . 
 
loop_ 
 _atom_site_aniso_label 
 _atom_site_aniso_U_11 
 _atom_site_aniso_U_22 
 _atom_site_aniso_U_33 
 _atom_site_aniso_U_23 
 _atom_site_aniso_U_13 
 _atom_site_aniso_U_12 
Rh1 0.03195(11) 0.03585(13) 0.03130(12) -0.01172(9) -0.00321(8) -0.00222(8) 
S1 0.0392(4) 0.0362(4) 0.0356(4) -0.0058(3) -0.0006(3) 0.0023(3) 
S2 0.0449(4) 0.0427(4) 0.0348(4) -0.0069(3) -0.0078(3) -0.0065(3) 
N1 0.0426(13) 0.0360(14) 0.0351(13) -0.0102(11) 0.0015(10) -0.0022(11) 
C2 0.0396(15) 0.0374(17) 0.0341(16) -0.0065(13) 0.0002(12) -0.0034(12) 
N3 0.0526(15) 0.0376(15) 0.0392(15) -0.0077(12) -0.0004(11) 0.0071(12) 
C4 0.0578(19) 0.0397(18) 0.0388(18) -0.0042(15) -0.0035(14) 0.0026(15) 
C5 0.0548(18) 0.048(2) 0.0331(17) -0.0088(15) 0.0008(13) -0.0048(15) 
C6 0.0538(18) 0.0424(19) 0.052(2) -0.0161(16) 0.0036(15) 0.0045(15) 
C7 0.097(3) 0.048(2) 0.049(2) 0.0016(18) -0.010(2) 0.018(2) 
C8 0.125(4) 0.093(4) 0.137(5) 0.002(3) -0.052(4) 0.046(3) 
C9 0.238(7) 0.100(4) 0.050(3) 0.015(3) -0.003(4) 0.073(4) 
C10 0.212(7) 0.047(3) 0.118(4) 0.007(3) -0.051(4) 0.015(3) 
N1' 0.0486(14) 0.0614(19) 0.0395(15) -0.0173(14) -0.0145(12) -0.0038(13) 
C2' 0.0372(14) 0.0500(19) 0.0384(17) -0.0156(15) -0.0062(12) -0.0075(13) 
N3' 0.0509(14) 0.0423(15) 0.0370(14) -0.0114(12) -0.0087(11) -0.0091(12) 
C4' 0.0464(17) 0.050(2) 0.052(2) -0.0197(17) -0.0094(14) -0.0121(15) 
C5' 0.0537(19) 0.066(2) 0.050(2) -0.0287(18) -0.0116(15) -0.0141(17) 
C6' 0.082(3) 0.084(3) 0.043(2) -0.017(2) -0.0251(18) 0.007(2) 
C7' 0.071(2) 0.049(2) 0.070(2) -0.0222(19) -0.0142(19) -0.0152(18) 
C8' 0.101(3) 0.054(3) 0.113(4) -0.016(2) -0.051(3) 0.000(2) 
C9' 0.096(3) 0.066(3) 0.118(4) -0.046(3) -0.023(3) -0.015(2) 
C10' 0.131(4) 0.064(3) 0.074(3) -0.006(2) 0.003(3) -0.025(3) 
C11 0.0360(15) 0.052(2) 0.0510(19) -0.0113(16) -0.0093(13) 0.0000(14) 
C12 0.0446(16) 0.052(2) 0.0481(19) -0.0132(16) -0.0168(14) 0.0086(14) 
C13 0.0353(15) 0.051(2) 0.055(2) -0.0163(16) -0.0125(14) -0.0051(14) 
C14 0.0321(14) 0.058(2) 0.051(2) -0.0256(17) 0.0017(13) -0.0039(14) 
C15 0.0348(14) 0.0491(19) 0.0403(17) -0.0166(15) 0.0023(12) -0.0108(13) 
C16 0.0375(15) 0.0498(19) 0.0503(19) -0.0253(16) 0.0006(13) -0.0119(13) 
C17 0.0419(16) 0.061(2) 0.0412(18) -0.0208(16) -0.0086(13) -0.0107(15) 
C18 0.054(2) 0.067(3) 0.096(3) -0.015(2) -0.031(2) 0.0047(19) 
C19 0.061(2) 0.087(3) 0.082(3) -0.045(2) 0.007(2) 0.007(2) 
C20 0.062(2) 0.062(2) 0.045(2) -0.0074(17) 0.0045(16) -0.0194(18) 
C21 0.070(2) 0.053(2) 0.072(2) -0.0374(19) 0.0006(18) -0.0089(18) 
C22 0.071(2) 0.099(3) 0.048(2) -0.028(2) -0.0115(18) -0.023(2) 
O7 0.0470(12) 0.0369(12) 0.0368(12) -0.0131(10) -0.0070(9) 0.0003(9) 
S3 0.0525(5) 0.0683(6) 0.0579(6) -0.0287(5) -0.0024(4) -0.0104(4) 
F1 0.118(2) 0.146(2) 0.0829(18) -0.0456(17) -0.0509(16) 0.0199(18) 
F2 0.158(3) 0.0676(17) 0.0937(19) -0.0271(15) -0.0187(17) 0.0057(16) 
F3 0.0931(18) 0.135(2) 0.0759(17) -0.0218(16) 0.0268(14) -0.0122(16) 
O1 0.0587(14) 0.098(2) 0.0633(16) -0.0247(15) -0.0149(12) -0.0103(14) 
O2 0.152(3) 0.068(2) 0.101(2) -0.0441(18) -0.009(2) -0.0053(19) 
O3 0.0495(14) 0.145(3) 0.0851(19) -0.0573(19) 0.0069(13) -0.0306(16) 
C23 0.074(3) 0.069(3) 0.071(3) -0.031(2) -0.014(2) 0.005(2) 
S4 0.0512(5) 0.0594(6) 0.0497(5) -0.0261(4) -0.0056(4) -0.0051(4) 
O4 0.0886(18) 0.091(2) 0.0428(14) -0.0194(14) -0.0109(13) -0.0017(15) 
O5 0.0619(15) 0.0787(19) 0.102(2) -0.0353(16) -0.0051(14) -0.0251(14) 
O6 0.0687(16) 0.093(2) 0.0868(19) -0.0535(17) -0.0160(14) 0.0179(15) 
C24 0.080(3) 0.060(2) 0.049(2) -0.0228(19) -0.0060(19) -0.011(2) 
F4 0.181(3) 0.0953(19) 0.0471(14) -0.0160(13) -0.0342(15) -0.0148(18) 
F5 0.123(2) 0.109(2) 0.115(2) -0.0468(17) -0.0193(17) -0.0603(17) 
F6 0.138(2) 0.108(2) 0.1002(19) -0.0716(17) -0.0243(17) 0.0343(18) 
C25 0.060(3) 0.139(5) 0.232(7) -0.103(5) 0.002(4) -0.025(3) 
Cl1 0.0986(10) 0.1528(14) 0.1691(15) -0.0799(12) 0.0093(10) -0.0200(9) 
Cl2 0.1369(14) 0.1655(17) 0.1935(19) -0.0376(15) -0.0119(13) -0.0269(13) 
 
_geom_special_details 
; 
 All esds (except the esd in the dihedral angle between two l.s. planes) 
 are estimated using the full covariance matrix.  The cell esds are taken 
 into account individually in the estimation of esds in distances, angles 
 and torsion angles; correlations between esds in cell parameters are only 
 used when they are defined by crystal symmetry.  An approximate (isotropic) 
 treatment of cell esds is used for estimating esds involving l.s. planes. 
; 
 
loop_ 
 _geom_bond_atom_site_label_1 
 _geom_bond_atom_site_label_2 
 _geom_bond_distance 
 _geom_bond_site_symmetry_2 
 _geom_bond_publ_flag 
Rh1 O7 2.132(2) . ? 
Rh1 C17 2.137(3) . ? 
Rh1 C14 2.156(3) . ? 
Rh1 C16 2.160(3) . ? 
Rh1 C15 2.162(3) . ? 
Rh1 C13 2.166(3) . ? 
Rh1 S1 2.4005(7) . ? 
Rh1 S2 2.4277(8) . ? 
S1 C2 1.756(3) . ? 
S1 C11 1.827(3) . ? 
S2 C2' 1.761(3) . ? 
S2 C12 1.828(3) . ? 
N1 C2 1.346(3) . ? 
N1 C5 1.361(3) . ? 
N1 C6 1.460(3) . ? 
C2 N3 1.322(3) . ? 
N3 C4 1.374(4) . ? 
C4 C5 1.359(4) . ? 
C4 C7 1.498(4) . ? 
C7 C9 1.493(5) . ? 
C7 C8 1.494(6) . ? 
C7 C10 1.503(6) . ? 
N1' C2' 1.342(3) . ? 
N1' C5' 1.361(4) . ? 
N1' C6' 1.467(4) . ? 
C2' N3' 1.312(3) . ? 
N3' C4' 1.372(4) . ? 
C4' C5' 1.355(4) . ? 
C4' C7' 1.502(4) . ? 
C7' C10' 1.519(5) . ? 
C7' C9' 1.520(5) . ? 
C7' C8' 1.524(5) . ? 
C11 C12 1.508(4) . ? 
C13 C14 1.412(4) . ? 
C13 C17 1.426(4) . ? 
C13 C18 1.493(4) . ? 
C14 C15 1.426(4) . ? 
C14 C19 1.486(4) . ? 
C15 C16 1.412(4) . ? 
C15 C20 1.490(4) . ? 
C16 C17 1.439(4) . ? 
C16 C21 1.490(4) . ? 
C17 C22 1.492(4) . ? 
S3 O3 1.418(2) . ? 
S3 O1 1.421(2) . ? 
S3 O2 1.424(3) . ? 
S3 C23 1.812(4) . ? 
F1 C23 1.315(4) . ? 
F2 C23 1.319(4) . ? 
F3 C23 1.312(4) . ? 
S4 O5 1.418(2) . ? 
S4 O6 1.425(2) . ? 
S4 O4 1.430(2) . ? 
S4 C24 1.808(4) . ? 
C24 F4 1.300(4) . ? 
C24 F5 1.310(4) . ? 
C24 F6 1.314(4) . ? 
C25 Cl1 1.723(5) . ? 
C25 Cl2 1.727(6) . ? 
 
loop_ 
 _geom_angle_atom_site_label_1 
 _geom_angle_atom_site_label_2 
 _geom_angle_atom_site_label_3 
 _geom_angle 
 _geom_angle_site_symmetry_1 
 _geom_angle_site_symmetry_3 
 _geom_angle_publ_flag 
O7 Rh1 C17 105.32(10) . . ? 
O7 Rh1 C14 107.28(10) . . ? 
C17 Rh1 C14 64.97(11) . . ? 
O7 Rh1 C16 144.43(10) . . ? 
C17 Rh1 C16 39.14(11) . . ? 
C14 Rh1 C16 64.48(11) . . ? 
O7 Rh1 C15 145.84(10) . . ? 
C17 Rh1 C15 64.85(11) . . ? 
C14 Rh1 C15 38.56(11) . . ? 
C16 Rh1 C15 38.14(10) . . ? 
O7 Rh1 C13 87.71(10) . . ? 
C17 Rh1 C13 38.70(11) . . ? 
C14 Rh1 C13 38.12(11) . . ? 
C16 Rh1 C13 64.39(11) . . ? 
C15 Rh1 C13 63.98(11) . . ? 
O7 Rh1 S1 91.33(6) . . ? 
C17 Rh1 S1 100.42(8) . . ? 
C14 Rh1 S1 158.56(9) . . ? 
C16 Rh1 S1 94.20(8) . . ? 
C15 Rh1 S1 122.10(8) . . ? 
C13 Rh1 S1 136.03(9) . . ? 
O7 Rh1 S2 94.98(6) . . ? 
C17 Rh1 S2 158.85(9) . . ? 
C14 Rh1 S2 103.69(8) . . ? 
C16 Rh1 S2 120.50(9) . . ? 
C15 Rh1 S2 94.96(8) . . ? 
C13 Rh1 S2 139.20(9) . . ? 
S1 Rh1 S2 84.69(3) . . ? 
C2 S1 C11 103.46(14) . . ? 
C2 S1 Rh1 107.44(9) . . ? 
C11 S1 Rh1 101.30(10) . . ? 
C2' S2 C12 100.42(14) . . ? 
C2' S2 Rh1 110.11(10) . . ? 
C12 S2 Rh1 102.83(10) . . ? 
C2 N1 C5 106.2(2) . . ? 
C2 N1 C6 128.0(2) . . ? 
C5 N1 C6 125.8(2) . . ? 
N3 C2 N1 112.2(2) . . ? 
N3 C2 S1 125.1(2) . . ? 
N1 C2 S1 122.5(2) . . ? 
C2 N3 C4 105.2(2) . . ? 
C5 C4 N3 109.0(3) . . ? 
C5 C4 C7 129.8(3) . . ? 
N3 C4 C7 121.1(3) . . ? 
C4 C5 N1 107.4(3) . . ? 
C9 C7 C8 110.6(4) . . ? 
C9 C7 C4 109.8(3) . . ? 
C8 C7 C4 110.1(3) . . ? 
C9 C7 C10 109.9(4) . . ? 
C8 C7 C10 107.1(4) . . ? 
C4 C7 C10 109.4(3) . . ? 
C2' N1' C5' 106.4(2) . . ? 
C2' N1' C6' 128.2(3) . . ? 
C5' N1' C6' 125.3(3) . . ? 
N3' C2' N1' 111.8(3) . . ? 
N3' C2' S2 125.3(2) . . ? 
N1' C2' S2 122.9(2) . . ? 
C2' N3' C4' 105.9(2) . . ? 
C5' C4' N3' 108.7(3) . . ? 
C5' C4' C7' 130.6(3) . . ? 
N3' C4' C7' 120.7(3) . . ? 
C4' C5' N1' 107.3(3) . . ? 
C4' C7' C10' 109.7(3) . . ? 
C4' C7' C9' 110.0(3) . . ? 
C10' C7' C9' 110.0(3) . . ? 
C4' C7' C8' 109.1(3) . . ? 
C10' C7' C8' 109.7(3) . . ? 
C9' C7' C8' 108.4(3) . . ? 
C12 C11 S1 106.7(2) . . ? 
C11 C12 S2 112.05(19) . . ? 
C14 C13 C17 108.7(3) . . ? 
C14 C13 C18 125.3(3) . . ? 
C17 C13 C18 126.0(3) . . ? 
C14 C13 Rh1 70.57(15) . . ? 
C17 C13 Rh1 69.56(16) . . ? 
C18 C13 Rh1 124.7(2) . . ? 
C13 C14 C15 107.8(3) . . ? 
C13 C14 C19 126.1(3) . . ? 
C15 C14 C19 125.7(3) . . ? 
C13 C14 Rh1 71.31(16) . . ? 
C15 C14 Rh1 70.95(15) . . ? 
C19 C14 Rh1 128.8(2) . . ? 
C16 C15 C14 108.4(3) . . ? 
C16 C15 C20 126.2(3) . . ? 
C14 C15 C20 125.2(3) . . ? 
C16 C15 Rh1 70.83(16) . . ? 
C14 C15 Rh1 70.48(16) . . ? 
C20 C15 Rh1 128.5(2) . . ? 
C15 C16 C17 107.9(3) . . ? 
C15 C16 C21 126.1(3) . . ? 
C17 C16 C21 125.9(3) . . ? 
C15 C16 Rh1 71.03(16) . . ? 
C17 C16 Rh1 69.58(16) . . ? 
C21 C16 Rh1 127.6(2) . . ? 
C13 C17 C16 107.1(3) . . ? 
C13 C17 C22 126.6(3) . . ? 
C16 C17 C22 126.0(3) . . ? 
C13 C17 Rh1 71.74(17) . . ? 
C16 C17 Rh1 71.28(16) . . ? 
C22 C17 Rh1 126.9(2) . . ? 
O3 S3 O1 114.29(16) . . ? 
O3 S3 O2 116.06(19) . . ? 
O1 S3 O2 114.54(19) . . ? 
O3 S3 C23 103.24(18) . . ? 
O1 S3 C23 103.63(17) . . ? 
O2 S3 C23 102.66(19) . . ? 
F3 C23 F1 107.4(3) . . ? 
F3 C23 F2 106.8(4) . . ? 
F1 C23 F2 107.7(3) . . ? 
F3 C23 S3 111.4(3) . . ? 
F1 C23 S3 111.9(3) . . ? 
F2 C23 S3 111.4(3) . . ? 
O5 S4 O6 115.35(17) . . ? 
O5 S4 O4 114.85(16) . . ? 
O6 S4 O4 115.01(16) . . ? 
O5 S4 C24 103.09(17) . . ? 
O6 S4 C24 103.87(17) . . ? 
O4 S4 C24 102.14(17) . . ? 
F4 C24 F5 106.5(3) . . ? 
F4 C24 F6 108.5(3) . . ? 
F5 C24 F6 107.2(3) . . ? 
F4 C24 S4 112.5(3) . . ? 
F5 C24 S4 111.1(3) . . ? 
F6 C24 S4 110.9(3) . . ? 
Cl1 C25 Cl2 113.6(3) . . ? 
 
loop_ 
 _geom_hbond_atom_site_label_D 
 _geom_hbond_atom_site_label_H 
 _geom_hbond_atom_site_label_A 
 _geom_hbond_distance_DH 
 _geom_hbond_distance_HA 
 _geom_hbond_distance_DA 
 _geom_hbond_angle_DHA 
 _geom_hbond_site_symmetry_A 
O7 H7B N3'  0.90(4) 1.76(4) 2.617(3) 157(3) . 
O7 H7A N3  0.83(4) 1.87(4) 2.649(3) 156(4) . 
 
_diffrn_measured_fraction_theta_max    0.990 
_diffrn_reflns_theta_full              30.57 
_diffrn_measured_fraction_theta_full   0.990 
_refine_diff_density_max    0.981 
_refine_diff_density_min   -0.467 
_refine_diff_density_rms    0.075 

#===END

data_03MMD293 
 
_audit_creation_method            SHELXL-97 
_chemical_name_systematic 
; 
1,4-bis-(4-tert-butyl-1-methyl-1H-imidazol-2-yl)-1,4-dithiabutane 
; 
_chemical_name_common             ? 
_chemical_melting_point           ? 
_chemical_formula_moiety          ? 
_chemical_formula_sum 
 'C18 H30 N4 S2' 
_chemical_formula_weight          366.58 
 
loop_ 
 _atom_type_symbol 
 _atom_type_description 
 _atom_type_scat_dispersion_real 
 _atom_type_scat_dispersion_imag 
 _atom_type_scat_source 
 'C'  'C'   0.0033   0.0016 
 'International Tables Vol C Tables 4.2.6.8 and 6.1.1.4' 
 'H'  'H'   0.0000   0.0000 
 'International Tables Vol C Tables 4.2.6.8 and 6.1.1.4' 
 'N'  'N'   0.0061   0.0033 
 'International Tables Vol C Tables 4.2.6.8 and 6.1.1.4' 
 'S'  'S'   0.1246   0.1234 
 'International Tables Vol C Tables 4.2.6.8 and 6.1.1.4' 
 
_symmetry_cell_setting           'Triclinic'
_symmetry_space_group_name_H-M   'P -1'
 
loop_ 
 _symmetry_equiv_pos_as_xyz 
 'x, y, z' 
 '-x, -y, -z' 
 
_cell_length_a                    6.430(1) 
_cell_length_b                    9.321(1) 
_cell_length_c                    9.463(1) 
_cell_angle_alpha                 83.124(2) 
_cell_angle_beta                  73.692(2) 
_cell_angle_gamma                 75.836(2) 
_cell_volume                      527.0(1) 
_cell_formula_units_Z             1 
_cell_measurement_temperature     293(2)
_cell_measurement_reflns_used     4203
_cell_measurement_theta_min        2.25
_cell_measurement_theta_max       30.24 
 
_exptl_crystal_description        'block'
_exptl_crystal_colour             'colorless'
_exptl_crystal_size_min           0.254
_exptl_crystal_size_mid           0.282
_exptl_crystal_size_max           0.346 
_exptl_crystal_density_meas       ? 
_exptl_crystal_density_diffrn     1.155 
_exptl_crystal_density_method     'not measured' 
_exptl_crystal_F_000              198 
_exptl_absorpt_coefficient_mu     0.260 
_exptl_absorpt_correction_type    'analytical: face-indexed'
_exptl_absorpt_correction_T_min   0.9111
_exptl_absorpt_correction_T_max   0.9530 
_exptl_absorpt_process_details    ? 
 
_exptl_special_details 
; 
 ? 
; 
 
_diffrn_ambient_temperature       293(2) 
_diffrn_radiation_wavelength      0.71073 
_diffrn_radiation_type            MoK\a 
_diffrn_radiation_source          'fine-focus sealed tube' 
_diffrn_radiation_monochromator   graphite 
_diffrn_measurement_device_type   'Bruker Smart Apex CCD diffractometer' 
_diffrn_measurement_method        '\y and \w-scans'
_diffrn_detector_area_resol_mean  0.661 
_diffrn_standards_number          ? 
_diffrn_standards_interval_count  ? 
_diffrn_standards_interval_time   ? 
_diffrn_standards_decay_%         0 
_diffrn_reflns_number             9242 
_diffrn_reflns_av_R_equivalents   0.0361 
_diffrn_reflns_av_sigmaI/netI     0.0362 
_diffrn_reflns_limit_h_min        -9 
_diffrn_reflns_limit_h_max        9 
_diffrn_reflns_limit_k_min        -13 
_diffrn_reflns_limit_k_max        13 
_diffrn_reflns_limit_l_min        -13 
_diffrn_reflns_limit_l_max        13 
_diffrn_reflns_theta_min          2.25 
_diffrn_reflns_theta_max          30.52 
_reflns_number_total              3191 
_reflns_number_gt                 2276 
_reflns_threshold_expression      >2sigma(I) 
 
_computing_data_collection        'SMART V 5.625'
_computing_cell_refinement        'SMART V 5.625'
_computing_data_reduction         'SAINT V 6.23C'
_computing_structure_solution     'SHELXTL V 6.10 (Bruker, 1999)' 
_computing_structure_refinement   'SHELXTL V 6.10 (Bruker, 1999)' 
_computing_molecular_graphics     'SHELXTL V 6.10 (Bruker, 1999)'
_computing_publication_material   'SHELXTL V 6.10 (Bruker, 1999)' 
 
_refine_special_details 
; 
 Refinement of F^2^ against ALL reflections.  The weighted R-factor wR and 
 goodness of fit S are based on F^2^, conventional R-factors R are based 
 on F, with F set to zero for negative F^2^. The threshold expression of 
 F^2^ > 2sigma(F^2^) is used only for calculating R-factors(gt) etc. and is 
 not relevant to the choice of reflections for refinement.  R-factors based 
 on F^2^ are statistically about twice as large as those based on F, and R- 
 factors based on ALL data will be even larger. 
; 
 
_refine_ls_structure_factor_coef  Fsqd  
_refine_ls_matrix_type            full 
_refine_ls_weighting_scheme       calc  
_refine_ls_weighting_details 
 'calc w=1/[\s^2^(Fo^2^)+(0.1096P)^2^+0.0055P] where P=(Fo^2^+2Fc^2^)/3' 
_atom_sites_solution_primary      direct 
_atom_sites_solution_secondary    difmap 
_atom_sites_solution_hydrogens    geom 
_refine_ls_hydrogen_treatment     noref 
_refine_ls_extinction_method      none 
_refine_ls_extinction_coef        ? 
_refine_ls_number_reflns          3191 
_refine_ls_number_parameters      113 
_refine_ls_number_restraints      0 
_refine_ls_R_factor_all           0.0842 
_refine_ls_R_factor_gt            0.0627 
_refine_ls_wR_factor_ref          0.1847 
_refine_ls_wR_factor_gt           0.1692 
_refine_ls_goodness_of_fit_ref    1.031 
_refine_ls_restrained_S_all       1.031 
_refine_ls_shift/su_max           0.000 
_refine_ls_shift/su_mean          0.000 
 
loop_ 
 _atom_site_label 
 _atom_site_type_symbol 
 _atom_site_fract_x 
 _atom_site_fract_y 
 _atom_site_fract_z 
 _atom_site_U_iso_or_equiv 
 _atom_site_adp_type 
 _atom_site_occupancy 
 _atom_site_symmetry_multiplicity 
 _atom_site_calc_flag 
 _atom_site_refinement_flags 
 _atom_site_disorder_assembly 
 _atom_site_disorder_group 
S1 S 1.39691(9) 0.21714(6) 0.38821(6) 0.0642(2) Uani 1 1 d . . . 
N1 N 0.9509(3) 0.32992(16) 0.46703(16) 0.0472(4) Uani 1 1 d . . . 
C2 C 1.1319(3) 0.25267(19) 0.5109(2) 0.0460(4) Uani 1 1 d . . . 
N3 N 1.0818(2) 0.20983(17) 0.65202(17) 0.0479(4) Uani 1 1 d . . . 
C4 C 0.8549(3) 0.26280(18) 0.70196(19) 0.0424(4) Uani 1 1 d . . . 
C5 C 0.7743(3) 0.33726(19) 0.5904(2) 0.0481(4) Uani 1 1 d . . . 
H5 H 0.6273 0.3846 0.5959 0.058 Uiso 1 1 calc R . . 
C6 C 0.9413(4) 0.3916(3) 0.3195(2) 0.0695(6) Uani 1 1 d . . . 
H6A H 0.9560 0.4926 0.3096 0.083 Uiso 1 1 calc R . . 
H6B H 0.8015 0.3880 0.3039 0.083 Uiso 1 1 calc R . . 
H6C H 1.0602 0.3348 0.2478 0.083 Uiso 1 1 calc R . . 
C7 C 0.7362(3) 0.2296(2) 0.8590(2) 0.0497(4) Uani 1 1 d . . . 
C8 C 0.8347(4) 0.2907(3) 0.9627(2) 0.0690(6) Uani 1 1 d . . . 
H8A H 0.9932 0.2554 0.9368 0.083 Uiso 1 1 calc R . . 
H8B H 0.7735 0.2580 1.0626 0.083 Uiso 1 1 calc R . . 
H8C H 0.7992 0.3971 0.9537 0.083 Uiso 1 1 calc R . . 
C9 C 0.7710(4) 0.0618(3) 0.8878(3) 0.0711(6) Uani 1 1 d . . . 
H9A H 0.7094 0.0222 0.8237 0.085 Uiso 1 1 calc R . . 
H9B H 0.6983 0.0394 0.9886 0.085 Uiso 1 1 calc R . . 
H9C H 0.9271 0.0184 0.8693 0.085 Uiso 1 1 calc R . . 
C10 C 0.4883(4) 0.2968(3) 0.8868(3) 0.0774(7) Uani 1 1 d . . . 
H10A H 0.4649 0.4025 0.8694 0.093 Uiso 1 1 calc R . . 
H10B H 0.4143 0.2735 0.9871 0.093 Uiso 1 1 calc R . . 
H10C H 0.4292 0.2570 0.8214 0.093 Uiso 1 1 calc R . . 
C11 C 1.5380(3) 0.0713(2) 0.4953(3) 0.0643(6) Uani 1 1 d . . . 
H11A H 1.6969 0.0537 0.4506 0.077 Uiso 1 1 calc R . . 
H11B H 1.5103 0.1033 0.5941 0.077 Uiso 1 1 calc R . . 
 
loop_ 
 _atom_site_aniso_label 
 _atom_site_aniso_U_11 
 _atom_site_aniso_U_22 
 _atom_site_aniso_U_33 
 _atom_site_aniso_U_23 
 _atom_site_aniso_U_13 
 _atom_site_aniso_U_12 
S1 0.0551(3) 0.0697(4) 0.0525(3) -0.0009(2) 0.0057(2) -0.0098(2) 
N1 0.0540(8) 0.0458(8) 0.0429(8) 0.0011(6) -0.0155(6) -0.0116(6) 
C2 0.0480(9) 0.0443(9) 0.0416(9) -0.0046(7) -0.0058(7) -0.0084(7) 
N3 0.0430(7) 0.0524(8) 0.0414(8) -0.0018(6) -0.0072(6) -0.0023(6) 
C4 0.0401(8) 0.0407(8) 0.0432(9) -0.0077(6) -0.0084(6) -0.0033(6) 
C5 0.0430(8) 0.0473(9) 0.0525(10) -0.0022(7) -0.0148(7) -0.0046(7) 
C6 0.0875(15) 0.0777(15) 0.0503(12) 0.0137(10) -0.0273(11) -0.0284(12) 
C7 0.0432(8) 0.0589(11) 0.0423(9) -0.0058(8) -0.0052(7) -0.0082(7) 
C8 0.0754(14) 0.0890(16) 0.0435(11) -0.0117(10) -0.0077(10) -0.0253(12) 
C9 0.0750(14) 0.0706(14) 0.0633(14) 0.0113(11) -0.0113(11) -0.0229(11) 
C10 0.0490(11) 0.1060(19) 0.0609(14) -0.0080(13) 0.0005(10) -0.0024(11) 
C11 0.0458(10) 0.0655(12) 0.0764(15) -0.0233(11) -0.0046(9) -0.0064(9) 
 
_geom_special_details 
; 
 All esds (except the esd in the dihedral angle between two l.s. planes) 
 are estimated using the full covariance matrix.  The cell esds are taken 
 into account individually in the estimation of esds in distances, angles 
 and torsion angles; correlations between esds in cell parameters are only 
 used when they are defined by crystal symmetry.  An approximate (isotropic) 
 treatment of cell esds is used for estimating esds involving l.s. planes. 
; 
 
loop_ 
 _geom_bond_atom_site_label_1 
 _geom_bond_atom_site_label_2 
 _geom_bond_distance 
 _geom_bond_site_symmetry_2 
 _geom_bond_publ_flag 
S1 C2 1.7513(18) . ? 
S1 C11 1.811(2) . ? 
N1 C2 1.355(2) . ? 
N1 C5 1.376(2) . ? 
N1 C6 1.457(2) . ? 
C2 N3 1.319(2) . ? 
N3 C4 1.383(2) . ? 
C4 C5 1.349(2) . ? 
C4 C7 1.502(2) . ? 
C7 C10 1.523(3) . ? 
C7 C9 1.527(3) . ? 
C7 C8 1.533(3) . ? 
C11 C11 1.510(4) 2_856 ? 
 
loop_ 
 _geom_angle_atom_site_label_1 
 _geom_angle_atom_site_label_2 
 _geom_angle_atom_site_label_3 
 _geom_angle 
 _geom_angle_site_symmetry_1 
 _geom_angle_site_symmetry_3 
 _geom_angle_publ_flag 
C2 S1 C11 99.38(9) . . ? 
C2 N1 C5 106.01(15) . . ? 
C2 N1 C6 127.64(18) . . ? 
C5 N1 C6 126.34(17) . . ? 
N3 C2 N1 112.17(15) . . ? 
N3 C2 S1 126.10(14) . . ? 
N1 C2 S1 121.73(14) . . ? 
C2 N3 C4 105.06(15) . . ? 
C5 C4 N3 109.75(16) . . ? 
C5 C4 C7 130.12(15) . . ? 
N3 C4 C7 120.11(15) . . ? 
C4 C5 N1 107.00(15) . . ? 
C4 C7 C10 110.41(17) . . ? 
C4 C7 C9 108.84(16) . . ? 
C10 C7 C9 108.95(19) . . ? 
C4 C7 C8 109.35(15) . . ? 
C10 C7 C8 110.58(18) . . ? 
C9 C7 C8 108.66(18) . . ? 
C11 C11 S1 112.1(2) 2_856 . ? 
 
_diffrn_measured_fraction_theta_max    0.991 
_diffrn_reflns_theta_full              30.52 
_diffrn_measured_fraction_theta_full   0.991 
_refine_diff_density_max    0.475 
_refine_diff_density_min   -0.344 
_refine_diff_density_rms    0.070 
